# Supplementary material for: Controlled construction of hierarchical Co1−xS structures as high performance anode materials for lithium ion batteries
Source: Royal Society of Chemistry journal article supplement (doi:10.1039/c3ce41915k), 2013-11-05
Supplement: c3ce41915k.pdf [file c3ce41915k.pdf]

## Supplementary Information

### Controlled construction of hierarchical $\text{Co}_{1-x}\text{S}$ structures as high performance anode materials for lithium ion batteries

Shumin Liu<sup>1,2</sup>, Jinxian Wang<sup>\*1,2</sup>, Jianwei Wang<sup>2,3</sup>, Feifei Zhang<sup>2,3</sup>, Fei Liang<sup>2</sup> and Limin Wang<sup>\*2</sup>

<sup>1</sup> School of Chemistry and Environmental Engineering, Changchun University of Science and Technology, Changchun 130025, China. E-mail: wjx87@sina.com

<sup>2</sup> State Key Laboratory of Rare Earth Resource Utilization, Changchun Institute of Applied Chemistry, CAS, Changchun 130022, China. Fax: +86-431-85262836; Tel: +86-431-85262447; E-mail: lmwang@ciac.ac.cn

<sup>3</sup> University of Chinese Academy of Sciences, Beijing 100049, China

**Corresponding author:** Limin Wang, Email: lmwang@ciac.ac.cn, Tel: +86-431-85262447, Fax: +86-431-85262836

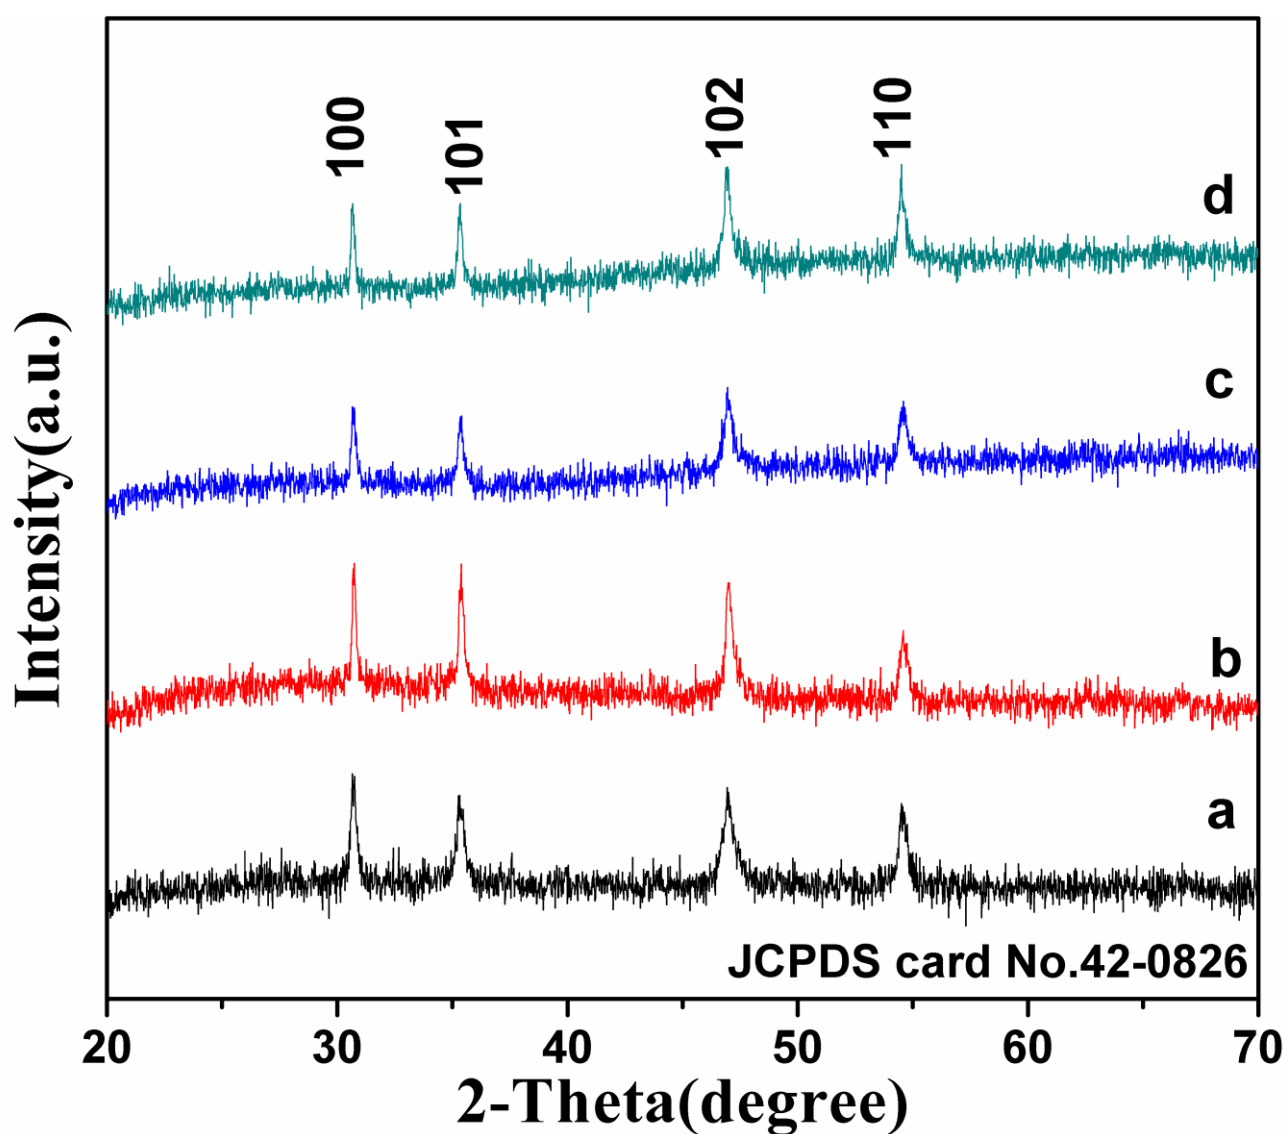

**Fig.S1** XRD patterns of the  $\text{Co}_{1-x}\text{S}$  samples obtained at 200°C for 24 h with the different Na<sub>3</sub>Cit content (a) 0 mmol, (b) 0.05 mmol, (c) 0.15 mmol and (d) 0.3 mmol.

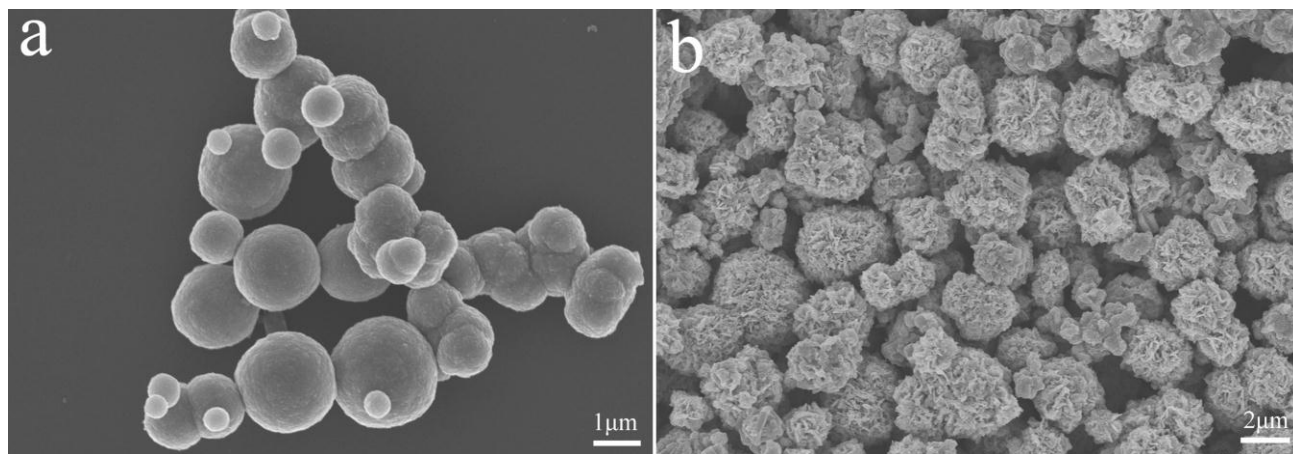

**Fig. S2** SEM images of the as-prepared products formed in the presence of (a) CTAB, (b) PVP
